# Supplementary material
Source: publisher figshare collection journal article supplement (https://tandf.figshare.com/articles/dataset/_/17081311)
Supplement: Supplementary file 1 [file 1]

# Figures

Figure 2 (Analysis 2.1)

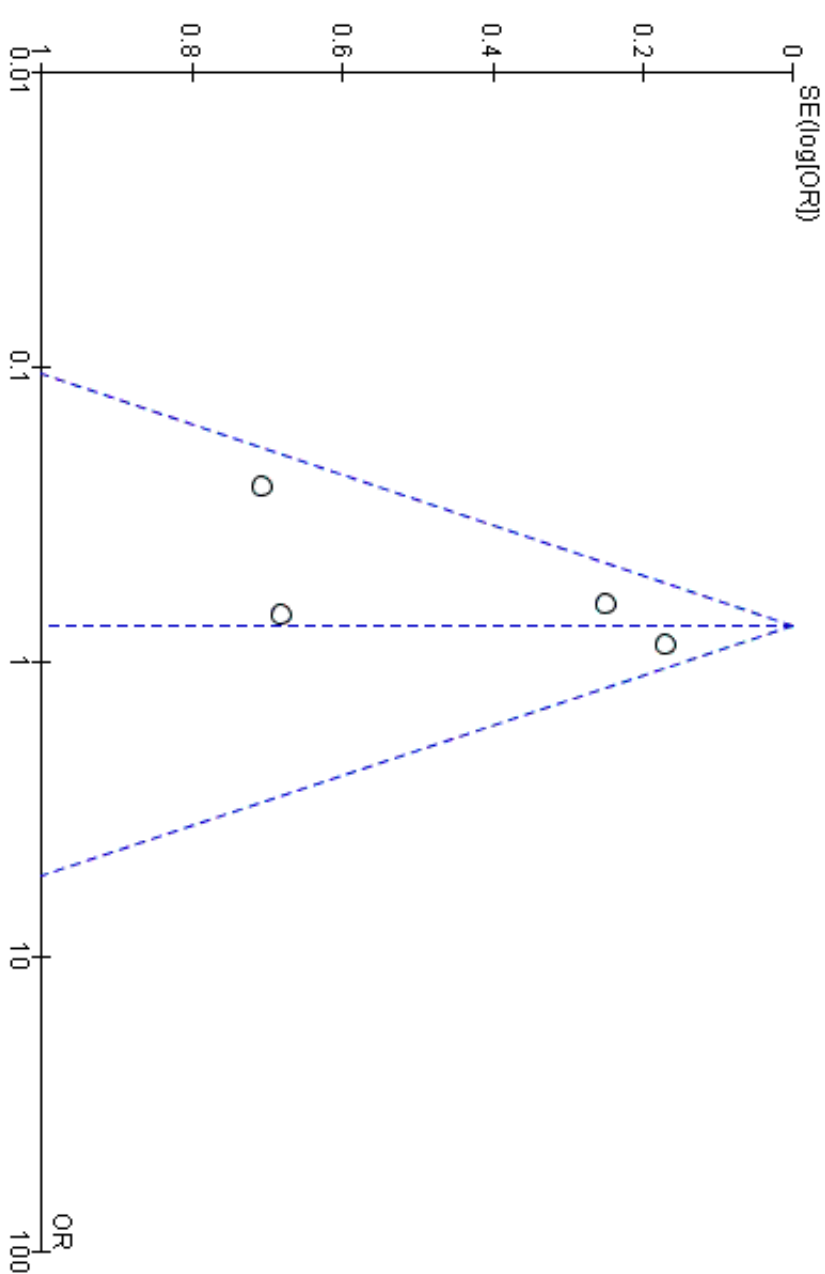

Appendix 2. Funnel plot of comparison: Speculum Exam versus Digital Exam with PPRM for Composite Maternal Infectious Morbidity.
